# Supplementary material
Source: ML conference proceedings conference paper supplement (https://www.ecva.net/papers/eccv_2022/papers_ECCV/html/136610299_ECCV_2022_paper.php)
Supplement: Supplementary file 7 [file 136610299-supp.zip]

Archive with 26 entries (23 files):
- 1925-supp/
- 1925-supp/1925-supp.pdf
- 1925-supp/1925_Camera_Ready_Supp_latex/
- 1925-supp/1925_Camera_Ready_Supp_latex/comment.sty
- 1925-supp/1925_Camera_Ready_Supp_latex/eccv2022submission.aux
- 1925-supp/1925_Camera_Ready_Supp_latex/eccv2022submission.bbl
- 1925-supp/1925_Camera_Ready_Supp_latex/eccv2022submission.blg
- 1925-supp/1925_Camera_Ready_Supp_latex/eccv2022submission.log
- 1925-supp/1925_Camera_Ready_Supp_latex/eccv2022submission.pdf
- 1925-supp/1925_Camera_Ready_Supp_latex/eccv2022submission.synctex.gz
- 1925-supp/1925_Camera_Ready_Supp_latex/eccv2022submission.tex
- 1925-supp/1925_Camera_Ready_Supp_latex/egbib.bib
- 1925-supp/1925_Camera_Ready_Supp_latex/eijkel2.eps
- 1925-supp/1925_Camera_Ready_Supp_latex/eijkel2.pdf
- 1925-supp/1925_Camera_Ready_Supp_latex/history.txt
- 1925-supp/1925_Camera_Ready_Supp_latex/images/
- 1925-supp/1925_Camera_Ready_Supp_latex/images/cross_enhancement.pdf
- 1925-supp/1925_Camera_Ready_Supp_latex/images/ic_mha_schematic.pdf
- 1925-supp/1925_Camera_Ready_Supp_latex/images/nb_b_triplet.pdf
- 1925-supp/1925_Camera_Ready_Supp_latex/images/patch_sampling.pdf
- 1925-supp/1925_Camera_Ready_Supp_latex/images/sup.pdf
- 1925-supp/1925_Camera_Ready_Supp_latex/llncs.cls
- 1925-supp/1925_Camera_Ready_Supp_latex/llncsdoc.pdf
- 1925-supp/1925_Camera_Ready_Supp_latex/README.txt
- 1925-supp/1925_Camera_Ready_Supp_latex/ruler.sty
- 1925-supp/1925_Camera_Ready_Supp_latex/splncs04.bst
