# Supplementary material
Source: ML conference proceedings conference paper supplement (https://www.ecva.net/papers/eccv_2022/papers_ECCV/html/136610299_ECCV_2022_paper.php)
Supplement: Supplementary file 7 [file 136610299-supp.zip › 1925-supp/1925_Camera_Ready_Supp_latex/eccv2022submission.aux]

\relax 
\citation{fsre}
\citation{fsre}
\citation{fsre}
\@writefile{toc}{\contentsline {title}{The Supplementary Material for Towards Comprehensive Representation Enhancement in Semantics-guided Self-supervised Monocular Depth Estimation}{1}\protected@file@percent }
\@writefile{toc}{\authcount {5}}
\@writefile{toc}{\contentsline {author}{Jingyuan Ma\unskip {} \and Xiangyu Lei \and Nan Liu \and Xian Zhao \and Shiliang Pu\unskip {}}{1}\protected@file@percent }
\@writefile{toc}{\contentsline {section}{\numberline {1}Boundary Triplet Margin Loss with Patch-Based Sampling Strategy in \cite  {fsre}}{1}\protected@file@percent }
\@writefile{lof}{\contentsline {figure}{\numberline {1}{\ignorespaces The visualization of patch-based sampling strategy from \cite  {fsre}. Semantic labels are firstly divided by kernel of size $K \times K$ to formulate triplets for computing semantics-guided triplet loss. Within a patch, \leavevmode {\color  {green}green} pixel represent the anchor, \leavevmode {\color  {gray}gray} pixels are its positives and \leavevmode {\color  {black}black} pixels are its negatives. The yellow line represents the semantic boundary within this patch. With the sampled triplets, the positive distance $d^{+}_b$ and negative distance $d^{-}_b$ for this anchor are computed with the normalized depth features.}}{1}\protected@file@percent }
\newlabel{fig:patchsampling}{{1}{1}}
\citation{fsre}
\citation{fsre}
\citation{fsre}
\citation{fsre}
\citation{fsre}
\newlabel{eq:posdist}{{1}{2}}
\newlabel{eq:negdist}{{2}{2}}
\newlabel{eq:triplet}{{3}{2}}
\newlabel{eq:bt}{{4}{2}}
\@writefile{toc}{\contentsline {section}{\numberline {2}Cross-Task Similarity Computation Process}{2}\protected@file@percent }
\@writefile{lof}{\contentsline {figure}{\numberline {2}{\ignorespaces The visualization of cross-task similarity computation \cite  {fsre}. Here, this computation process is illustrated on depth feature. The inputs are the key-value pair of depth feature and the query of semantic feature.}}{3}\protected@file@percent }
\newlabel{fig:visual}{{2}{3}}
\@writefile{lof}{\contentsline {figure}{\numberline {3}{\ignorespaces The Detailed Schematic of IC-MHA block. Output Channel dimension: $out\_ch = in\_ch \times num\_head \times exp\_ratio $, where $num\_head$ is the number of attention heads and $exp\_ratio$ is the expansion ration of each head.}}{3}\protected@file@percent }
\newlabel{fig:schematic}{{3}{3}}
\citation{swintr}
\citation{fsre}
\citation{fsre}
\citation{fsre}
\@writefile{toc}{\contentsline {section}{\numberline {3}Detailed Schematic of IC-MHA module.}{4}\protected@file@percent }
\@writefile{toc}{\contentsline {section}{\numberline {4}Additional Discussions}{4}\protected@file@percent }
\@writefile{toc}{\contentsline {subsection}{\numberline {4.1}Discussion on Proposed IC-MHA Module}{4}\protected@file@percent }
\@writefile{toc}{\contentsline {subsubsection}{The Role of Query-key-value Triplets in Our IC-MHA Module.}{4}\protected@file@percent }
\@writefile{toc}{\contentsline {subsubsection}{Why Applying Multi-size Window Partition Process for Local Attention Computation.}{4}\protected@file@percent }
\@writefile{toc}{\contentsline {subsection}{\numberline {4.2}Discussion on Proposed Minimum-distance Based Candidate Mining Strategy}{4}\protected@file@percent }
\@writefile{toc}{\contentsline {subsubsection}{The Relationship of Sampled Boundary and Non-boundary Triplets.}{4}\protected@file@percent }
\citation{fcgf}
\@writefile{lof}{\contentsline {figure}{\numberline {4}{\ignorespaces The visualization of final triplets for boundary triplet loss $\mathcal  {L}_{BT}$ \cite  {fsre}(\leavevmode {\color  [RGB]{0,100,0}dark green} box) and proposed hardest non-boundary triplet loss $\mathcal  {L}_{NBT}$ (\leavevmode {\color  {red}red} triangle). \leavevmode {\color  {yellow}Yellow} dot represents non-boundary anchor, and \leavevmode {\color  {green}green} dot represents boundary anchor, which is also the center of the patch. \leavevmode {\color  {brown}Brown} dot and \leavevmode {\color  {red}red} dot are the hardest negative and positive for non-boundary anchor, not for boundary anchor.}}{5}\protected@file@percent }
\newlabel{fig:triplets}{{4}{5}}
\@writefile{toc}{\contentsline {subsubsection}{Why Employ Hardest Sample Strategy for Non-Boundary Triplet.}{5}\protected@file@percent }
\citation{fsre}
\citation{fsre}
\@writefile{toc}{\contentsline {section}{\numberline {5}Additional Ablation Study on Hyperparameters Settings}{6}\protected@file@percent }
\@writefile{lot}{\contentsline {table}{\numberline {1}{\ignorespaces Ablations on number of head implemented in proposed IC-MHA module}}{6}\protected@file@percent }
\newlabel{table:abla_head}{{1}{6}}
\@writefile{lot}{\contentsline {table}{\numberline {2}{\ignorespaces Ablations on IC-MHA module implementation base structure}}{6}\protected@file@percent }
\newlabel{table:impl_base}{{2}{6}}
\@writefile{lot}{\contentsline {table}{\numberline {3}{\ignorespaces Ablations on window size($w_h$) adopted in our proposed IC-MHA module}}{6}\protected@file@percent }
\newlabel{table:window}{{3}{6}}
\@writefile{lot}{\contentsline {table}{\numberline {4}{\ignorespaces Ablations on levels($s$) that our proposed IC-MHA module is located}}{6}\protected@file@percent }
\newlabel{table:levels}{{4}{6}}
\citation{fsre}
\citation{fsre}
\citation{fsre}
\citation{fsre}
\citation{fsre}
\@writefile{lot}{\contentsline {table}{\numberline {5}{\ignorespaces Ablations on the different levels that $\mathcal  {L}_{NBT}$ and $\mathcal  {L}_{BT}$ apply on }}{7}\protected@file@percent }
\newlabel{table:levelloss}{{5}{7}}
\@writefile{lot}{\contentsline {table}{\numberline {6}{\ignorespaces Ablations on the number of non-boundary anchors sampled($N_{0}$) at level 0}}{7}\protected@file@percent }
\newlabel{table:samplenum}{{6}{7}}
\@writefile{toc}{\contentsline {section}{\numberline {6}Additional Qualitative Examples}{7}\protected@file@percent }
\@writefile{lof}{\contentsline {figure}{\numberline {5}{\ignorespaces Extra qualitative examples. (a)Depth output of \cite  {fsre}(left) and ours(right). (b)Error map of \cite  {fsre}(left) and ours(right). }}{8}\protected@file@percent }
\newlabel{fig:segdepth}{{5}{8}}
\bibstyle{splncs04}
\bibdata{egbib}
\bibcite{fcgf}{1}
\bibcite{fsre}{2}
\bibcite{swintr}{3}
