# Supplementary material
Source: ML conference proceedings conference paper supplement (https://www.ecva.net/papers/eccv_2022/papers_ECCV/html/136610299_ECCV_2022_paper.php)
Supplement: Supplementary file 7 [file 136610299-supp.zip › 1925-supp/1925_Camera_Ready_Supp_latex/eccv2022submission.bbl]

\begin{thebibliography}{1}
\providecommand{\url}[1]{\texttt{#1}}
\providecommand{\urlprefix}{URL }
\providecommand{\doi}[1]{https://doi.org/#1}

\bibitem{fcgf}
Choy, C., Park, J., Koltun, V.: Fully convolutional geometric features. In:
  Proceedings of the IEEE/CVF International Conference on Computer Vision. pp.
  8958--8966 (2019)

\bibitem{fsre}
Jung, H., Park, E., Yoo, S.: Fine-grained semantics-aware representation
  enhancement for self-supervised monocular depth estimation. In: Proceedings
  of the IEEE/CVF International Conference on Computer Vision (ICCV). pp.
  12642--12652 (October 2021)

\bibitem{swintr}
Liu, Z., Lin, Y., Cao, Y., Hu, H., Wei, Y., Zhang, Z., Lin, S., Guo, B.: Swin
  transformer: Hierarchical vision transformer using shifted windows (2021)

\end{thebibliography}
