# Supplementary material
Source: ML conference proceedings conference paper supplement (https://www.ecva.net/papers/eccv_2022/papers_ECCV/html/136610299_ECCV_2022_paper.php)
Supplement: Supplementary file 7 [file 136610299-supp.zip › 1925-supp/1925_Camera_Ready_Supp_latex/eccv2022submission.blg]

This is BibTeX, Version 0.99d (TeX Live 2019/W32TeX)
Capacity: max_strings=100000, hash_size=100000, hash_prime=85009
The top-level auxiliary file: eccv2022submission.aux
The style file: splncs04.bst
Database file #1: egbib.bib
Warning--empty booktitle in swintr
You've used 3 entries,
            2850 wiz_defined-function locations,
            611 strings with 5183 characters,
and the built_in function-call counts, 2147 in all, are:
= -- 180
> -- 76
< -- 2
+ -- 31
- -- 28
* -- 136
:= -- 273
add.period$ -- 4
call.type$ -- 3
change.case$ -- 27
chr.to.int$ -- 0
cite$ -- 4
duplicate$ -- 178
empty$ -- 187
format.name$ -- 31
if$ -- 472
int.to.chr$ -- 0
int.to.str$ -- 3
missing$ -- 34
newline$ -- 15
num.names$ -- 6
pop$ -- 76
preamble$ -- 1
purify$ -- 20
quote$ -- 0
skip$ -- 64
stack$ -- 0
substring$ -- 139
swap$ -- 92
text.length$ -- 2
text.prefix$ -- 0
top$ -- 0
type$ -- 12
warning$ -- 1
while$ -- 14
width$ -- 4
write$ -- 32
(There was 1 warning)
