# Supplementary material
Source: ML conference proceedings conference paper supplement (https://www.ecva.net/papers/eccv_2022/papers_ECCV/html/136610299_ECCV_2022_paper.php)
Supplement: Supplementary file 7 [file 136610299-supp.zip › 1925-supp/1925_Camera_Ready_Supp_latex/eccv2022submission.log]

This is pdfTeX, Version 3.14159265-2.6-1.40.20 (TeX Live 2019/W32TeX) (preloaded format=pdflatex 2021.10.11)  20 JUL 2022 15:34
entering extended mode
 restricted \write18 enabled.
 %&-line parsing enabled.
**eccv2022submission.tex
(./eccv2022submission.tex
LaTeX2e <2018-12-01>
(./llncs.cls
Document Class: llncs 2018/03/10 v2.20 
 LaTeX document class for Lecture Notes in Computer Science
(d:/texlive/2019/texmf-dist/tex/latex/base/article.cls
Document Class: article 2018/09/03 v1.4i Standard LaTeX document class
(d:/texlive/2019/texmf-dist/tex/latex/base/size10.clo
File: size10.clo 2018/09/03 v1.4i Standard LaTeX file (size option)
)
\c@part=\count80
\c@section=\count81
\c@subsection=\count82
\c@subsubsection=\count83
\c@paragraph=\count84
\c@subparagraph=\count85
\c@figure=\count86
\c@table=\count87
\abovecaptionskip=\skip41
\belowcaptionskip=\skip42
\bibindent=\dimen102
)
(d:/texlive/2019/texmf-dist/tex/latex/tools/multicol.sty
Package: multicol 2018/12/27 v1.8v multicolumn formatting (FMi)
\c@tracingmulticols=\count88
\mult@box=\box27
\multicol@leftmargin=\dimen103
\c@unbalance=\count89
\c@collectmore=\count90
\doublecol@number=\count91
\multicoltolerance=\count92
\multicolpretolerance=\count93
\full@width=\dimen104
\page@free=\dimen105
\premulticols=\dimen106
\postmulticols=\dimen107
\multicolsep=\skip43
\multicolbaselineskip=\skip44
\partial@page=\box28
\last@line=\box29
\maxbalancingoverflow=\dimen108
\mult@rightbox=\box30
\mult@grightbox=\box31
\mult@gfirstbox=\box32
\mult@firstbox=\box33
\@tempa=\box34
\@tempa=\box35
\@tempa=\box36
\@tempa=\box37
\@tempa=\box38
\@tempa=\box39
\@tempa=\box40
\@tempa=\box41
\@tempa=\box42
\@tempa=\box43
\@tempa=\box44
\@tempa=\box45
\@tempa=\box46
\@tempa=\box47
\@tempa=\box48
\@tempa=\box49
\@tempa=\box50
\c@columnbadness=\count94
\c@finalcolumnbadness=\count95
\last@try=\dimen109
\multicolovershoot=\dimen110
\multicolundershoot=\dimen111
\mult@nat@firstbox=\box51
\colbreak@box=\box52
\mc@col@check@num=\count96
)
(d:/texlive/2019/texmf-dist/tex/latex/oberdiek/aliascnt.sty
Package: aliascnt 2018/09/07 v1.5 Alias counters (HO)
)
\c@chapter=\count97
LaTeX Font Info:    Redeclaring math symbol \Gamma on input line 362.
LaTeX Font Info:    Redeclaring math symbol \Delta on input line 363.
LaTeX Font Info:    Redeclaring math symbol \Theta on input line 364.
LaTeX Font Info:    Redeclaring math symbol \Lambda on input line 365.
LaTeX Font Info:    Redeclaring math symbol \Xi on input line 366.
LaTeX Font Info:    Redeclaring math symbol \Pi on input line 367.
LaTeX Font Info:    Redeclaring math symbol \Sigma on input line 368.
LaTeX Font Info:    Redeclaring math symbol \Upsilon on input line 369.
LaTeX Font Info:    Redeclaring math symbol \Phi on input line 370.
LaTeX Font Info:    Redeclaring math symbol \Psi on input line 371.
LaTeX Font Info:    Redeclaring math symbol \Omega on input line 372.
\tocchpnum=\dimen112
\tocsecnum=\dimen113
\tocsectotal=\dimen114
\tocsubsecnum=\dimen115
\tocsubsectotal=\dimen116
\tocsubsubsecnum=\dimen117
\tocsubsubsectotal=\dimen118
\tocparanum=\dimen119
\tocparatotal=\dimen120
\tocsubparanum=\dimen121
\@tempcntc=\count98
\fnindent=\dimen122
\c@@inst=\count99
\c@@auth=\count100
\c@auco=\count101
\instindent=\dimen123
\authrun=\box53
\authorrunning=\toks14
\tocauthor=\toks15
\titrun=\box54
\titlerunning=\toks16
\toctitle=\toks17
\c@theorem=\count102
\c@case=\count103
\c@conjecture=\count104
\c@corollary=\count105
\c@definition=\count106
\c@example=\count107
\c@exercise=\count108
\c@lemma=\count109
\c@note=\count110
\c@problem=\count111
\c@property=\count112
\c@proposition=\count113
\c@question=\count114
\c@solution=\count115
\c@remark=\count116
\headlineindent=\dimen124
)
(d:/texlive/2019/texmf-dist/tex/latex/graphics/graphicx.sty
Package: graphicx 2017/06/01 v1.1a Enhanced LaTeX Graphics (DPC,SPQR)

(d:/texlive/2019/texmf-dist/tex/latex/graphics/keyval.sty
Package: keyval 2014/10/28 v1.15 key=value parser (DPC)
\KV@toks@=\toks18
)
(d:/texlive/2019/texmf-dist/tex/latex/graphics/graphics.sty
Package: graphics 2017/06/25 v1.2c Standard LaTeX Graphics (DPC,SPQR)

(d:/texlive/2019/texmf-dist/tex/latex/graphics/trig.sty
Package: trig 2016/01/03 v1.10 sin cos tan (DPC)
)
(d:/texlive/2019/texmf-dist/tex/latex/graphics-cfg/graphics.cfg
File: graphics.cfg 2016/06/04 v1.11 sample graphics configuration
)
Package graphics Info: Driver file: pdftex.def on input line 99.

(d:/texlive/2019/texmf-dist/tex/latex/graphics-def/pdftex.def
File: pdftex.def 2018/01/08 v1.0l Graphics/color driver for pdftex
))
\Gin@req@height=\dimen125
\Gin@req@width=\dimen126
)
(d:/texlive/2019/texmf-dist/tex/latex/pgf/frontendlayer/tikz.sty
(d:/texlive/2019/texmf-dist/tex/latex/pgf/basiclayer/pgf.sty
(d:/texlive/2019/texmf-dist/tex/latex/pgf/utilities/pgfrcs.sty
(d:/texlive/2019/texmf-dist/tex/generic/pgf/utilities/pgfutil-common.tex
\pgfutil@everybye=\toks19
\pgfutil@tempdima=\dimen127
\pgfutil@tempdimb=\dimen128

(d:/texlive/2019/texmf-dist/tex/generic/pgf/utilities/pgfutil-common-lists.tex)
) (d:/texlive/2019/texmf-dist/tex/generic/pgf/utilities/pgfutil-latex.def
\pgfutil@abb=\box55

(d:/texlive/2019/texmf-dist/tex/latex/ms/everyshi.sty
Package: everyshi 2001/05/15 v3.00 EveryShipout Package (MS)
))
(d:/texlive/2019/texmf-dist/tex/generic/pgf/utilities/pgfrcs.code.tex
(d:/texlive/2019/texmf-dist/tex/generic/pgf/pgf.revision.tex)
Package: pgfrcs 2019/02/02 v3.1.1 (3.1.1)
))
Package: pgf 2019/02/02 v3.1.1 (3.1.1)

(d:/texlive/2019/texmf-dist/tex/latex/pgf/basiclayer/pgfcore.sty
(d:/texlive/2019/texmf-dist/tex/latex/pgf/systemlayer/pgfsys.sty
(d:/texlive/2019/texmf-dist/tex/generic/pgf/systemlayer/pgfsys.code.tex
Package: pgfsys 2019/02/02 v3.1.1 (3.1.1)

(d:/texlive/2019/texmf-dist/tex/generic/pgf/utilities/pgfkeys.code.tex
\pgfkeys@pathtoks=\toks20
\pgfkeys@temptoks=\toks21

(d:/texlive/2019/texmf-dist/tex/generic/pgf/utilities/pgfkeysfiltered.code.tex
\pgfkeys@tmptoks=\toks22
))
\pgf@x=\dimen129
\pgf@y=\dimen130
\pgf@xa=\dimen131
\pgf@ya=\dimen132
\pgf@xb=\dimen133
\pgf@yb=\dimen134
\pgf@xc=\dimen135
\pgf@yc=\dimen136
\w@pgf@writea=\write3
\r@pgf@reada=\read1
\c@pgf@counta=\count117
\c@pgf@countb=\count118
\c@pgf@countc=\count119
\c@pgf@countd=\count120
\t@pgf@toka=\toks23
\t@pgf@tokb=\toks24
\t@pgf@tokc=\toks25
\pgf@sys@id@count=\count121
 (d:/texlive/2019/texmf-dist/tex/generic/pgf/systemlayer/pgf.cfg
File: pgf.cfg 2019/02/02 v3.1.1 (3.1.1)
)
Driver file for pgf: pgfsys-pdftex.def

(d:/texlive/2019/texmf-dist/tex/generic/pgf/systemlayer/pgfsys-pdftex.def
File: pgfsys-pdftex.def 2019/02/02 v3.1.1 (3.1.1)

(d:/texlive/2019/texmf-dist/tex/generic/pgf/systemlayer/pgfsys-common-pdf.def
File: pgfsys-common-pdf.def 2019/02/02 v3.1.1 (3.1.1)
)))
(d:/texlive/2019/texmf-dist/tex/generic/pgf/systemlayer/pgfsyssoftpath.code.tex
File: pgfsyssoftpath.code.tex 2019/02/02 v3.1.1 (3.1.1)
\pgfsyssoftpath@smallbuffer@items=\count122
\pgfsyssoftpath@bigbuffer@items=\count123
)
(d:/texlive/2019/texmf-dist/tex/generic/pgf/systemlayer/pgfsysprotocol.code.tex
File: pgfsysprotocol.code.tex 2019/02/02 v3.1.1 (3.1.1)
)) (d:/texlive/2019/texmf-dist/tex/latex/xcolor/xcolor.sty
Package: xcolor 2016/05/11 v2.12 LaTeX color extensions (UK)

(d:/texlive/2019/texmf-dist/tex/latex/graphics-cfg/color.cfg
File: color.cfg 2016/01/02 v1.6 sample color configuration
)
Package xcolor Info: Driver file: pdftex.def on input line 225.
Package xcolor Info: Model `cmy' substituted by `cmy0' on input line 1348.
Package xcolor Info: Model `hsb' substituted by `rgb' on input line 1352.
Package xcolor Info: Model `RGB' extended on input line 1364.
Package xcolor Info: Model `HTML' substituted by `rgb' on input line 1366.
Package xcolor Info: Model `Hsb' substituted by `hsb' on input line 1367.
Package xcolor Info: Model `tHsb' substituted by `hsb' on input line 1368.
Package xcolor Info: Model `HSB' substituted by `hsb' on input line 1369.
Package xcolor Info: Model `Gray' substituted by `gray' on input line 1370.
Package xcolor Info: Model `wave' substituted by `hsb' on input line 1371.
)
(d:/texlive/2019/texmf-dist/tex/generic/pgf/basiclayer/pgfcore.code.tex
Package: pgfcore 2019/02/02 v3.1.1 (3.1.1)

(d:/texlive/2019/texmf-dist/tex/generic/pgf/math/pgfmath.code.tex
(d:/texlive/2019/texmf-dist/tex/generic/pgf/math/pgfmathcalc.code.tex
(d:/texlive/2019/texmf-dist/tex/generic/pgf/math/pgfmathutil.code.tex)
(d:/texlive/2019/texmf-dist/tex/generic/pgf/math/pgfmathparser.code.tex
\pgfmath@dimen=\dimen137
\pgfmath@count=\count124
\pgfmath@box=\box56
\pgfmath@toks=\toks26
\pgfmath@stack@operand=\toks27
\pgfmath@stack@operation=\toks28
)
(d:/texlive/2019/texmf-dist/tex/generic/pgf/math/pgfmathfunctions.code.tex
(d:/texlive/2019/texmf-dist/tex/generic/pgf/math/pgfmathfunctions.basic.code.te
x)
(d:/texlive/2019/texmf-dist/tex/generic/pgf/math/pgfmathfunctions.trigonometric
.code.tex)
(d:/texlive/2019/texmf-dist/tex/generic/pgf/math/pgfmathfunctions.random.code.t
ex)
(d:/texlive/2019/texmf-dist/tex/generic/pgf/math/pgfmathfunctions.comparison.co
de.tex)
(d:/texlive/2019/texmf-dist/tex/generic/pgf/math/pgfmathfunctions.base.code.tex
)
(d:/texlive/2019/texmf-dist/tex/generic/pgf/math/pgfmathfunctions.round.code.te
x)
(d:/texlive/2019/texmf-dist/tex/generic/pgf/math/pgfmathfunctions.misc.code.tex
)
(d:/texlive/2019/texmf-dist/tex/generic/pgf/math/pgfmathfunctions.integerarithm
etics.code.tex)))
(d:/texlive/2019/texmf-dist/tex/generic/pgf/math/pgfmathfloat.code.tex
\c@pgfmathroundto@lastzeros=\count125
))
(d:/texlive/2019/texmf-dist/tex/generic/pgf/basiclayer/pgfcorepoints.code.tex
File: pgfcorepoints.code.tex 2019/02/02 v3.1.1 (3.1.1)
\pgf@picminx=\dimen138
\pgf@picmaxx=\dimen139
\pgf@picminy=\dimen140
\pgf@picmaxy=\dimen141
\pgf@pathminx=\dimen142
\pgf@pathmaxx=\dimen143
\pgf@pathminy=\dimen144
\pgf@pathmaxy=\dimen145
\pgf@xx=\dimen146
\pgf@xy=\dimen147
\pgf@yx=\dimen148
\pgf@yy=\dimen149
\pgf@zx=\dimen150
\pgf@zy=\dimen151
)
(d:/texlive/2019/texmf-dist/tex/generic/pgf/basiclayer/pgfcorepathconstruct.cod
e.tex
File: pgfcorepathconstruct.code.tex 2019/02/02 v3.1.1 (3.1.1)
\pgf@path@lastx=\dimen152
\pgf@path@lasty=\dimen153
)
(d:/texlive/2019/texmf-dist/tex/generic/pgf/basiclayer/pgfcorepathusage.code.te
x
File: pgfcorepathusage.code.tex 2019/02/02 v3.1.1 (3.1.1)
\pgf@shorten@end@additional=\dimen154
\pgf@shorten@start@additional=\dimen155
)
(d:/texlive/2019/texmf-dist/tex/generic/pgf/basiclayer/pgfcorescopes.code.tex
File: pgfcorescopes.code.tex 2019/02/02 v3.1.1 (3.1.1)
\pgfpic=\box57
\pgf@hbox=\box58
\pgf@layerbox@main=\box59
\pgf@picture@serial@count=\count126
)
(d:/texlive/2019/texmf-dist/tex/generic/pgf/basiclayer/pgfcoregraphicstate.code
.tex
File: pgfcoregraphicstate.code.tex 2019/02/02 v3.1.1 (3.1.1)
\pgflinewidth=\dimen156
)
(d:/texlive/2019/texmf-dist/tex/generic/pgf/basiclayer/pgfcoretransformations.c
ode.tex
File: pgfcoretransformations.code.tex 2019/02/02 v3.1.1 (3.1.1)
\pgf@pt@x=\dimen157
\pgf@pt@y=\dimen158
\pgf@pt@temp=\dimen159
)
(d:/texlive/2019/texmf-dist/tex/generic/pgf/basiclayer/pgfcorequick.code.tex
File: pgfcorequick.code.tex 2019/02/02 v3.1.1 (3.1.1)
)
(d:/texlive/2019/texmf-dist/tex/generic/pgf/basiclayer/pgfcoreobjects.code.tex
File: pgfcoreobjects.code.tex 2019/02/02 v3.1.1 (3.1.1)
)
(d:/texlive/2019/texmf-dist/tex/generic/pgf/basiclayer/pgfcorepathprocessing.co
de.tex
File: pgfcorepathprocessing.code.tex 2019/02/02 v3.1.1 (3.1.1)
)
(d:/texlive/2019/texmf-dist/tex/generic/pgf/basiclayer/pgfcorearrows.code.tex
File: pgfcorearrows.code.tex 2019/02/02 v3.1.1 (3.1.1)
\pgfarrowsep=\dimen160
)
(d:/texlive/2019/texmf-dist/tex/generic/pgf/basiclayer/pgfcoreshade.code.tex
File: pgfcoreshade.code.tex 2019/02/02 v3.1.1 (3.1.1)
\pgf@max=\dimen161
\pgf@sys@shading@range@num=\count127
)
(d:/texlive/2019/texmf-dist/tex/generic/pgf/basiclayer/pgfcoreimage.code.tex
File: pgfcoreimage.code.tex 2019/02/02 v3.1.1 (3.1.1)

(d:/texlive/2019/texmf-dist/tex/generic/pgf/basiclayer/pgfcoreexternal.code.tex
File: pgfcoreexternal.code.tex 2019/02/02 v3.1.1 (3.1.1)
\pgfexternal@startupbox=\box60
))
(d:/texlive/2019/texmf-dist/tex/generic/pgf/basiclayer/pgfcorelayers.code.tex
File: pgfcorelayers.code.tex 2019/02/02 v3.1.1 (3.1.1)
)
(d:/texlive/2019/texmf-dist/tex/generic/pgf/basiclayer/pgfcoretransparency.code
.tex
File: pgfcoretransparency.code.tex 2019/02/02 v3.1.1 (3.1.1)
)
(d:/texlive/2019/texmf-dist/tex/generic/pgf/basiclayer/pgfcorepatterns.code.tex
File: pgfcorepatterns.code.tex 2019/02/02 v3.1.1 (3.1.1)
) (d:/texlive/2019/texmf-dist/tex/generic/pgf/basiclayer/pgfcorerdf.code.tex
File: pgfcorerdf.code.tex 2019/02/02 v3.1.1 (3.1.1)
))) (d:/texlive/2019/texmf-dist/tex/generic/pgf/modules/pgfmoduleshapes.code.te
x
File: pgfmoduleshapes.code.tex 2019/02/02 v3.1.1 (3.1.1)
\pgfnodeparttextbox=\box61
)
(d:/texlive/2019/texmf-dist/tex/generic/pgf/modules/pgfmoduleplot.code.tex
File: pgfmoduleplot.code.tex 2019/02/02 v3.1.1 (3.1.1)
)
(d:/texlive/2019/texmf-dist/tex/latex/pgf/compatibility/pgfcomp-version-0-65.st
y
Package: pgfcomp-version-0-65 2019/02/02 v3.1.1 (3.1.1)
\pgf@nodesepstart=\dimen162
\pgf@nodesepend=\dimen163
)
(d:/texlive/2019/texmf-dist/tex/latex/pgf/compatibility/pgfcomp-version-1-18.st
y
Package: pgfcomp-version-1-18 2019/02/02 v3.1.1 (3.1.1)
)) (d:/texlive/2019/texmf-dist/tex/latex/pgf/utilities/pgffor.sty
(d:/texlive/2019/texmf-dist/tex/latex/pgf/utilities/pgfkeys.sty
(d:/texlive/2019/texmf-dist/tex/generic/pgf/utilities/pgfkeys.code.tex))
(d:/texlive/2019/texmf-dist/tex/latex/pgf/math/pgfmath.sty
(d:/texlive/2019/texmf-dist/tex/generic/pgf/math/pgfmath.code.tex))
(d:/texlive/2019/texmf-dist/tex/generic/pgf/utilities/pgffor.code.tex
Package: pgffor 2019/02/02 v3.1.1 (3.1.1)

(d:/texlive/2019/texmf-dist/tex/generic/pgf/math/pgfmath.code.tex)
\pgffor@iter=\dimen164
\pgffor@skip=\dimen165
\pgffor@stack=\toks29
\pgffor@toks=\toks30
))
(d:/texlive/2019/texmf-dist/tex/generic/pgf/frontendlayer/tikz/tikz.code.tex
Package: tikz 2019/02/02 v3.1.1 (3.1.1)

(d:/texlive/2019/texmf-dist/tex/generic/pgf/libraries/pgflibraryplothandlers.co
de.tex
File: pgflibraryplothandlers.code.tex 2019/02/02 v3.1.1 (3.1.1)
\pgf@plot@mark@count=\count128
\pgfplotmarksize=\dimen166
)
\tikz@lastx=\dimen167
\tikz@lasty=\dimen168
\tikz@lastxsaved=\dimen169
\tikz@lastysaved=\dimen170
\tikzleveldistance=\dimen171
\tikzsiblingdistance=\dimen172
\tikz@figbox=\box62
\tikz@figbox@bg=\box63
\tikz@tempbox=\box64
\tikz@tempbox@bg=\box65
\tikztreelevel=\count129
\tikznumberofchildren=\count130
\tikznumberofcurrentchild=\count131
\tikz@fig@count=\count132

(d:/texlive/2019/texmf-dist/tex/generic/pgf/modules/pgfmodulematrix.code.tex
File: pgfmodulematrix.code.tex 2019/02/02 v3.1.1 (3.1.1)
\pgfmatrixcurrentrow=\count133
\pgfmatrixcurrentcolumn=\count134
\pgf@matrix@numberofcolumns=\count135
)
\tikz@expandcount=\count136

(d:/texlive/2019/texmf-dist/tex/generic/pgf/frontendlayer/tikz/libraries/tikzli
brarytopaths.code.tex
File: tikzlibrarytopaths.code.tex 2019/02/02 v3.1.1 (3.1.1)
))) (./comment.sty
\CommentStream=\write4
 Excluding comment 'comment')
(d:/texlive/2019/texmf-dist/tex/latex/amsmath/amsmath.sty
Package: amsmath 2018/12/01 v2.17b AMS math features
\@mathmargin=\skip45

For additional information on amsmath, use the `?' option.
(d:/texlive/2019/texmf-dist/tex/latex/amsmath/amstext.sty
Package: amstext 2000/06/29 v2.01 AMS text

(d:/texlive/2019/texmf-dist/tex/latex/amsmath/amsgen.sty
File: amsgen.sty 1999/11/30 v2.0 generic functions
\@emptytoks=\toks31
\ex@=\dimen173
))
(d:/texlive/2019/texmf-dist/tex/latex/amsmath/amsbsy.sty
Package: amsbsy 1999/11/29 v1.2d Bold Symbols
\pmbraise@=\dimen174
)
(d:/texlive/2019/texmf-dist/tex/latex/amsmath/amsopn.sty
Package: amsopn 2016/03/08 v2.02 operator names
)
\inf@bad=\count137
LaTeX Info: Redefining \frac on input line 223.
\uproot@=\count138
\leftroot@=\count139
LaTeX Info: Redefining \overline on input line 385.
\classnum@=\count140
\DOTSCASE@=\count141
LaTeX Info: Redefining \ldots on input line 482.
LaTeX Info: Redefining \dots on input line 485.
LaTeX Info: Redefining \cdots on input line 606.
\Mathstrutbox@=\box66
\strutbox@=\box67
\big@size=\dimen175
LaTeX Font Info:    Redeclaring font encoding OML on input line 729.
LaTeX Font Info:    Redeclaring font encoding OMS on input line 730.


Package amsmath Warning: Unable to redefine math accent \vec.

\macc@depth=\count142
\c@MaxMatrixCols=\count143
\dotsspace@=\muskip10
\c@parentequation=\count144
\dspbrk@lvl=\count145
\tag@help=\toks32
\row@=\count146
\column@=\count147
\maxfields@=\count148
\andhelp@=\toks33
\eqnshift@=\dimen176
\alignsep@=\dimen177
\tagshift@=\dimen178
\tagwidth@=\dimen179
\totwidth@=\dimen180
\lineht@=\dimen181
\@envbody=\toks34
\multlinegap=\skip46
\multlinetaggap=\skip47
\mathdisplay@stack=\toks35
LaTeX Info: Redefining \[ on input line 2844.
LaTeX Info: Redefining \] on input line 2845.
) (d:/texlive/2019/texmf-dist/tex/latex/amsfonts/amssymb.sty
Package: amssymb 2013/01/14 v3.01 AMS font symbols

(d:/texlive/2019/texmf-dist/tex/latex/amsfonts/amsfonts.sty
Package: amsfonts 2013/01/14 v3.01 Basic AMSFonts support
\symAMSa=\mathgroup4
\symAMSb=\mathgroup5
LaTeX Font Info:    Overwriting math alphabet `\mathfrak' in version `bold'
(Font)                  U/euf/m/n --> U/euf/b/n on input line 106.
))
(d:/texlive/2019/texmf-dist/tex/latex/colortbl/colortbl.sty
Package: colortbl 2018/12/12 v1.0d Color table columns (DPC)

(d:/texlive/2019/texmf-dist/tex/latex/tools/array.sty
Package: array 2018/12/30 v2.4k Tabular extension package (FMi)
\col@sep=\dimen182
\ar@mcellbox=\box68
\extrarowheight=\dimen183
\NC@list=\toks36
\extratabsurround=\skip48
\backup@length=\skip49
\ar@cellbox=\box69
)
\everycr=\toks37
\minrowclearance=\skip50
)
(./eccv2022submission.aux)
\openout1 = `eccv2022submission.aux'.

LaTeX Font Info:    Checking defaults for OML/cmm/m/it on input line 28.
LaTeX Font Info:    ... okay on input line 28.
LaTeX Font Info:    Checking defaults for T1/cmr/m/n on input line 28.
LaTeX Font Info:    ... okay on input line 28.
LaTeX Font Info:    Checking defaults for OT1/cmr/m/n on input line 28.
LaTeX Font Info:    ... okay on input line 28.
LaTeX Font Info:    Checking defaults for OMS/cmsy/m/n on input line 28.
LaTeX Font Info:    ... okay on input line 28.
LaTeX Font Info:    Checking defaults for OMX/cmex/m/n on input line 28.
LaTeX Font Info:    ... okay on input line 28.
LaTeX Font Info:    Checking defaults for U/cmr/m/n on input line 28.
LaTeX Font Info:    ... okay on input line 28.

(d:/texlive/2019/texmf-dist/tex/context/base/mkii/supp-pdf.mkii
[Loading MPS to PDF converter (version 2006.09.02).]
\scratchcounter=\count149
\scratchdimen=\dimen184
\scratchbox=\box70
\nofMPsegments=\count150
\nofMParguments=\count151
\everyMPshowfont=\toks38
\MPscratchCnt=\count152
\MPscratchDim=\dimen185
\MPnumerator=\count153
\makeMPintoPDFobject=\count154
\everyMPtoPDFconversion=\toks39
) (d:/texlive/2019/texmf-dist/tex/latex/oberdiek/epstopdf-base.sty
Package: epstopdf-base 2016/05/15 v2.6 Base part for package epstopdf

(d:/texlive/2019/texmf-dist/tex/generic/oberdiek/infwarerr.sty
Package: infwarerr 2016/05/16 v1.4 Providing info/warning/error messages (HO)
)
(d:/texlive/2019/texmf-dist/tex/latex/oberdiek/grfext.sty
Package: grfext 2016/05/16 v1.2 Manage graphics extensions (HO)

(d:/texlive/2019/texmf-dist/tex/generic/oberdiek/kvdefinekeys.sty
Package: kvdefinekeys 2016/05/16 v1.4 Define keys (HO)

(d:/texlive/2019/texmf-dist/tex/generic/oberdiek/ltxcmds.sty
Package: ltxcmds 2016/05/16 v1.23 LaTeX kernel commands for general use (HO)
)))
(d:/texlive/2019/texmf-dist/tex/latex/oberdiek/kvoptions.sty
Package: kvoptions 2016/05/16 v3.12 Key value format for package options (HO)

(d:/texlive/2019/texmf-dist/tex/generic/oberdiek/kvsetkeys.sty
Package: kvsetkeys 2016/05/16 v1.17 Key value parser (HO)

(d:/texlive/2019/texmf-dist/tex/generic/oberdiek/etexcmds.sty
Package: etexcmds 2016/05/16 v1.6 Avoid name clashes with e-TeX commands (HO)

(d:/texlive/2019/texmf-dist/tex/generic/oberdiek/ifluatex.sty
Package: ifluatex 2016/05/16 v1.4 Provides the ifluatex switch (HO)
Package ifluatex Info: LuaTeX not detected.
))))
(d:/texlive/2019/texmf-dist/tex/generic/oberdiek/pdftexcmds.sty
Package: pdftexcmds 2018/09/10 v0.29 Utility functions of pdfTeX for LuaTeX (HO
)

(d:/texlive/2019/texmf-dist/tex/generic/oberdiek/ifpdf.sty
Package: ifpdf 2018/09/07 v3.3 Provides the ifpdf switch
)
Package pdftexcmds Info: LuaTeX not detected.
Package pdftexcmds Info: \pdf@primitive is available.
Package pdftexcmds Info: \pdf@ifprimitive is available.
Package pdftexcmds Info: \pdfdraftmode found.
)
Package epstopdf-base Info: Redefining graphics rule for `.eps' on input line 4
38.
Package grfext Info: Graphics extension search list:
(grfext)             [.pdf,.png,.jpg,.mps,.jpeg,.jbig2,.jb2,.PDF,.PNG,.JPG,.JPE
G,.JBIG2,.JB2,.eps]
(grfext)             \AppendGraphicsExtensions on input line 456.

(d:/texlive/2019/texmf-dist/tex/latex/latexconfig/epstopdf-sys.cfg
File: epstopdf-sys.cfg 2010/07/13 v1.3 Configuration of (r)epstopdf for TeX Liv
e
))
ABD: EveryShipout initializing macros Excluding 'comment' comment.
LaTeX Font Info:    Try loading font information for U+msa on input line 66.

(d:/texlive/2019/texmf-dist/tex/latex/amsfonts/umsa.fd
File: umsa.fd 2013/01/14 v3.01 AMS symbols A
)
LaTeX Font Info:    Try loading font information for U+msb on input line 66.

(d:/texlive/2019/texmf-dist/tex/latex/amsfonts/umsb.fd
File: umsb.fd 2013/01/14 v3.01 AMS symbols B
)
LaTeX Font Info:    Try loading font information for OMS+cmtt on input line 66.

LaTeX Font Info:    No file OMScmtt.fd. on input line 66.


LaTeX Font Warning: Font shape `OMS/cmtt/m/n' undefined
(Font)              using `OMS/cmsy/m/n' instead
(Font)              for symbol `textbraceleft' on input line 66.

<images/patch_sampling.pdf, id=4, 682.95152pt x 426.8748pt>
File: images/patch_sampling.pdf Graphic file (type pdf)
<use images/patch_sampling.pdf>
Package pdftex.def Info: images/patch_sampling.pdf  used on input line 70.
(pdftex.def)             Requested size: 227.60478pt x 142.26378pt.
[1


{d:/texlive/2019/texmf-var/fonts/map/pdftex/updmap/pdftex.map} <./images/patch_
sampling.pdf>]
<images/cross_enhancement.pdf, id=150, 768.23009pt x 512.1534pt>
File: images/cross_enhancement.pdf Graphic file (type pdf)
<use images/cross_enhancement.pdf>
Package pdftex.def Info: images/cross_enhancement.pdf  used on input line 100.
(pdftex.def)             Requested size: 256.07216pt x 170.71652pt.

Underfull \hbox (badness 10000) in paragraph at lines 97--106

 []


Underfull \hbox (badness 10000) in paragraph at lines 97--106

 []

<images/ic_mha_schematic.pdf, id=151, 1138.13205pt x 682.95152pt>
File: images/ic_mha_schematic.pdf Graphic file (type pdf)
<use images/ic_mha_schematic.pdf>
Package pdftex.def Info: images/ic_mha_schematic.pdf  used on input line 111.
(pdftex.def)             Requested size: 379.33589pt x 227.62204pt.

Overfull \hbox (32.21236pt too wide) in paragraph at lines 111--112
 [][] 
 []


Underfull \hbox (badness 10000) in paragraph at lines 108--117

 []


Underfull \hbox (badness 10000) in paragraph at lines 108--117

 []

[2] [3 <./images/cross_enhancement.pdf> <./images/ic_mha_schematic.pdf

pdfTeX warning: pdflatex.exe (file ./images/ic_mha_schematic.pdf): PDF inclusio
n: multiple pdfs with page group included in a single page
>]

pdfTeX warning: pdflatex.exe (file ./images/nb_b_triplet.pdf): PDF inclusion: f
ound PDF version <1.7>, but at most version <1.5> allowed
<images/nb_b_triplet.pdf, id=215, 963.6pt x 542.025pt>
File: images/nb_b_triplet.pdf Graphic file (type pdf)
<use images/nb_b_triplet.pdf>
Package pdftex.def Info: images/nb_b_triplet.pdf  used on input line 128.
(pdftex.def)             Requested size: 278.20177pt x 156.49014pt.
[4] [5 <./images/nb_b_triplet.pdf>]
Underfull \hbox (badness 1571) in paragraph at lines 152--152
[]\OT1/cmr/bx/n/9 Table 1. \OT1/cmr/m/n/9 Ab-la-tions on num-ber of
 []


Underfull \hbox (badness 1769) in paragraph at lines 152--152
\OT1/cmr/m/n/9 head im-ple-mented in pro-posed IC-
 []


Overfull \hbox (3.17995pt too wide) in paragraph at lines 152--152
[][] 
 []


Overfull \hbox (3.17995pt too wide) in paragraph at lines 166--166
 [][] 
 []


Underfull \hbox (badness 10000) in paragraph at lines 184--184
[]\OT1/cmr/bx/n/9 Table 3. \OT1/cmr/m/n/9 Ab-la-tions on win-dow
 []


Underfull \hbox (badness 3930) in paragraph at lines 184--184
\OT1/cmr/m/n/9 size($\OML/cmm/m/it/9 w[]$\OT1/cmr/m/n/9 ) adopted in our pro-po
sed
 []


Overfull \hbox (3.17995pt too wide) in paragraph at lines 184--184
[][] 
 []


Overfull \hbox (3.17995pt too wide) in paragraph at lines 199--199
 [][] 
 []

[6]
Overfull \hbox (6.37993pt too wide) in paragraph at lines 224--224
[][] 
 []


Underfull \hbox (badness 10000) in paragraph at lines 239--239
\OT1/cmr/m/n/9 ber of non-boundary an-chors
 []


Overfull \hbox (6.64928pt too wide) in paragraph at lines 239--239
 [][] 
 []

<images/sup.pdf, id=236, 483.72722pt x 682.95152pt>
File: images/sup.pdf Graphic file (type pdf)
<use images/sup.pdf>
Package pdftex.def Info: images/sup.pdf  used on input line 247.
(pdftex.def)             Requested size: 302.29185pt x 426.79134pt.
[7] [8 <./images/sup.pdf>] (./eccv2022submission.bbl) [9

]
(./eccv2022submission.aux)

LaTeX Font Warning: Some font shapes were not available, defaults substituted.

 ) 
Here is how much of TeX's memory you used:
 13017 strings out of 492623
 252819 string characters out of 6133289
 312812 words of memory out of 5000000
 16657 multiletter control sequences out of 15000+600000
 11090 words of font info for 43 fonts, out of 8000000 for 9000
 1141 hyphenation exceptions out of 8191
 55i,15n,48p,1610b,297s stack positions out of 5000i,500n,10000p,200000b,80000s
<d:/texlive/2019/texmf-dist/fonts/type1/public/amsfonts/cm/cmbx10.pfb><d:/tex
live/2019/texmf-dist/fonts/type1/public/amsfonts/cm/cmbx12.pfb><d:/texlive/2019
/texmf-dist/fonts/type1/public/amsfonts/cm/cmbx7.pfb><d:/texlive/2019/texmf-dis
t/fonts/type1/public/amsfonts/cm/cmbx9.pfb><d:/texlive/2019/texmf-dist/fonts/ty
pe1/public/amsfonts/cm/cmex10.pfb><d:/texlive/2019/texmf-dist/fonts/type1/publi
c/amsfonts/cm/cmmi10.pfb><d:/texlive/2019/texmf-dist/fonts/type1/public/amsfont
s/cm/cmmi5.pfb><d:/texlive/2019/texmf-dist/fonts/type1/public/amsfonts/cm/cmmi6
.pfb><d:/texlive/2019/texmf-dist/fonts/type1/public/amsfonts/cm/cmmi7.pfb><d:/t
exlive/2019/texmf-dist/fonts/type1/public/amsfonts/cm/cmmi9.pfb><d:/texlive/201
9/texmf-dist/fonts/type1/public/amsfonts/cm/cmr10.pfb><d:/texlive/2019/texmf-di
st/fonts/type1/public/amsfonts/cm/cmr5.pfb><d:/texlive/2019/texmf-dist/fonts/ty
pe1/public/amsfonts/cm/cmr6.pfb><d:/texlive/2019/texmf-dist/fonts/type1/public/
amsfonts/cm/cmr7.pfb><d:/texlive/2019/texmf-dist/fonts/type1/public/amsfonts/cm
/cmr9.pfb><d:/texlive/2019/texmf-dist/fonts/type1/public/amsfonts/cm/cmsy10.pfb
><d:/texlive/2019/texmf-dist/fonts/type1/public/amsfonts/cm/cmsy5.pfb><d:/texli
ve/2019/texmf-dist/fonts/type1/public/amsfonts/cm/cmsy6.pfb><d:/texlive/2019/te
xmf-dist/fonts/type1/public/amsfonts/cm/cmsy7.pfb><d:/texlive/2019/texmf-dist/f
onts/type1/public/amsfonts/cm/cmsy9.pfb><d:/texlive/2019/texmf-dist/fonts/type1
/public/amsfonts/cm/cmti10.pfb><d:/texlive/2019/texmf-dist/fonts/type1/public/a
msfonts/cm/cmtt9.pfb><d:/texlive/2019/texmf-dist/fonts/type1/public/amsfonts/sy
mbols/msbm10.pfb>
Output written on eccv2022submission.pdf (9 pages, 1850440 bytes).
PDF statistics:
 347 PDF objects out of 1000 (max. 8388607)
 264 compressed objects within 3 object streams
 0 named destinations out of 1000 (max. 500000)
 38 words of extra memory for PDF output out of 10000 (max. 10000000)
