# Supplementary material
Source: ML conference proceedings conference paper supplement (https://www.ecva.net/papers/eccv_2022/papers_ECCV/html/136610299_ECCV_2022_paper.php)

$H' \times W' \times C$

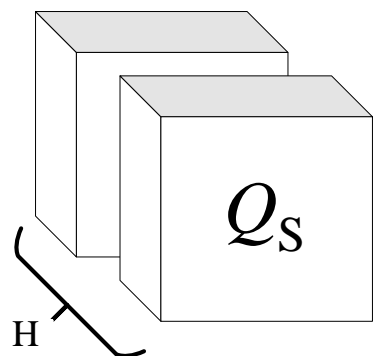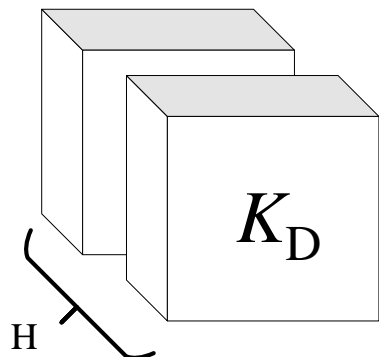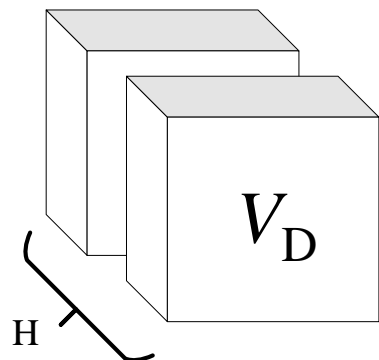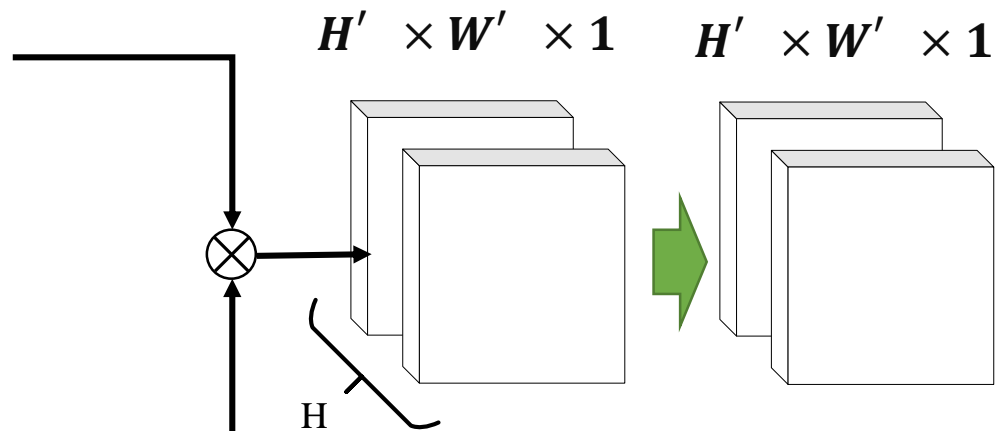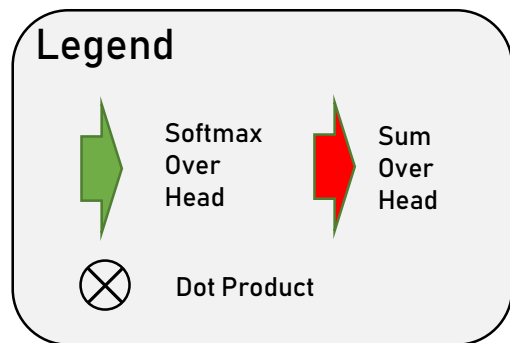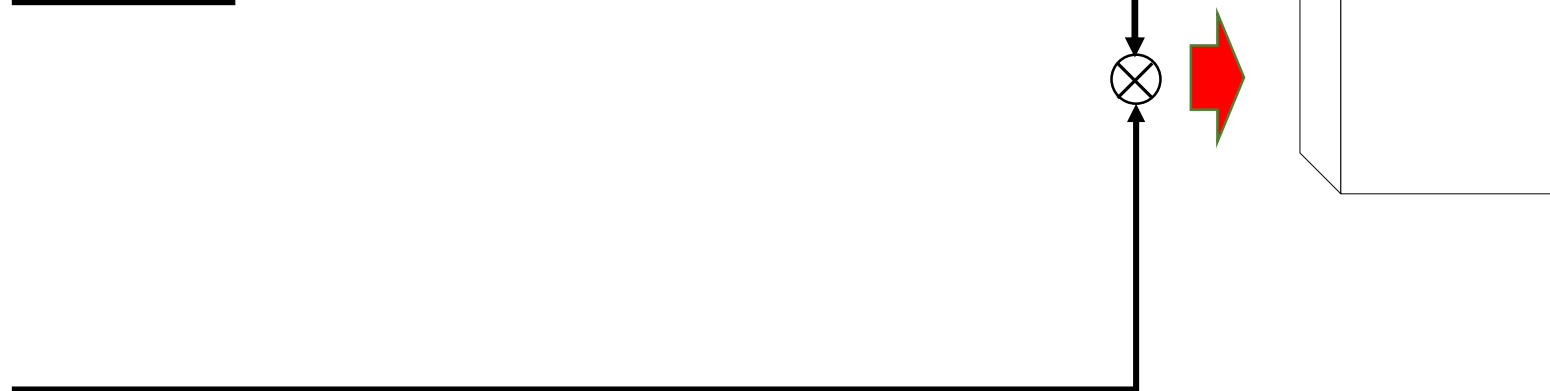

Supplement: Supplementary file 1 [file 136610299-supp.zip]

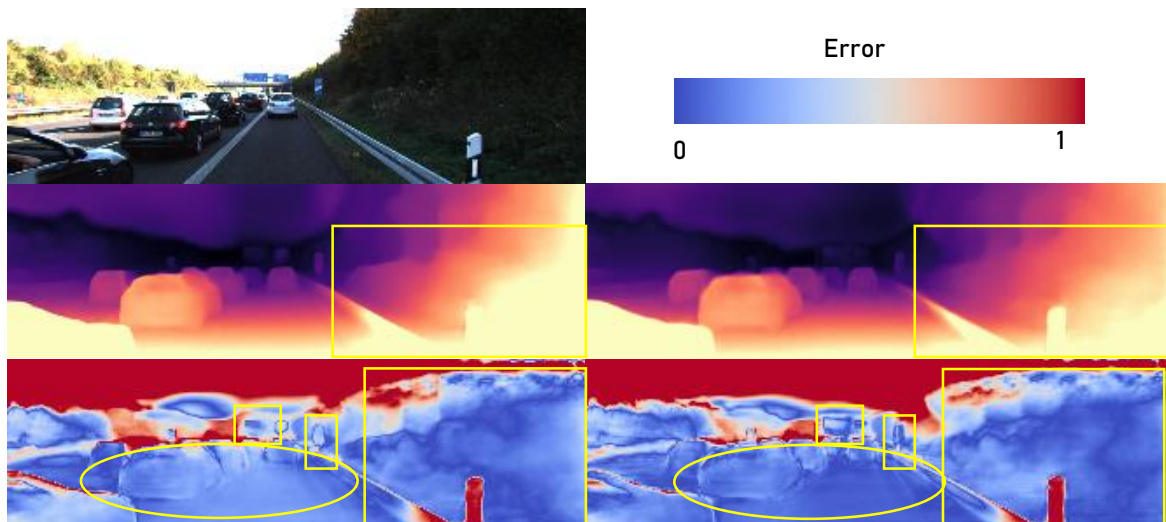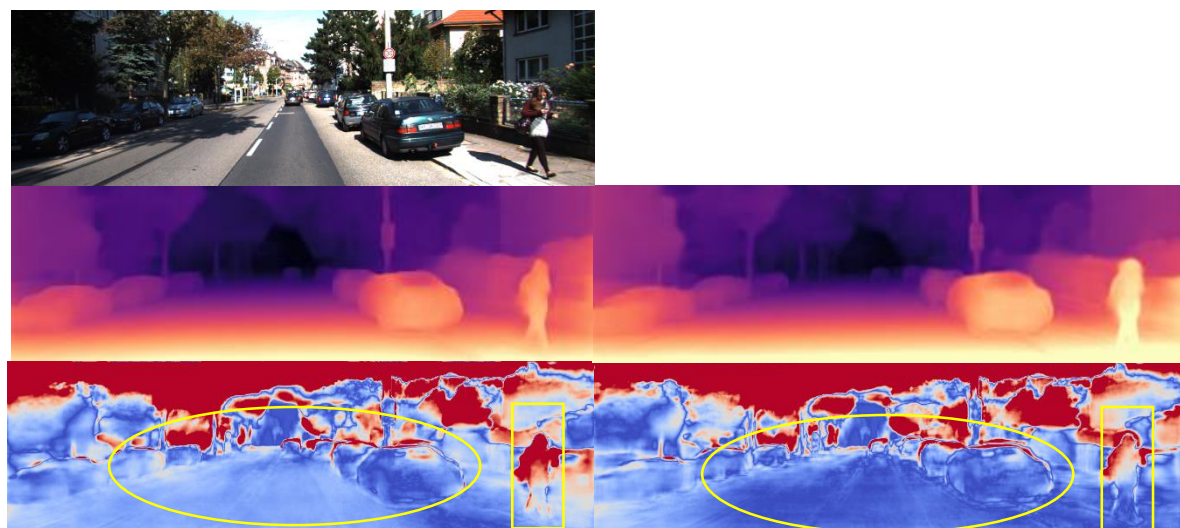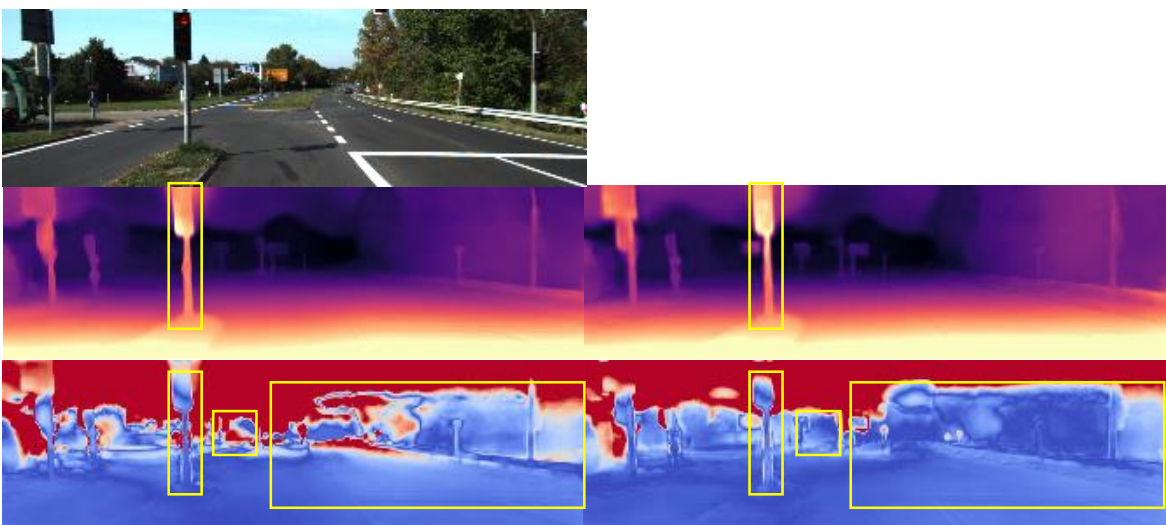

(a)

(b)

Supplement: Supplementary file 2 [file 136610299-supp.zip]

# Semantics

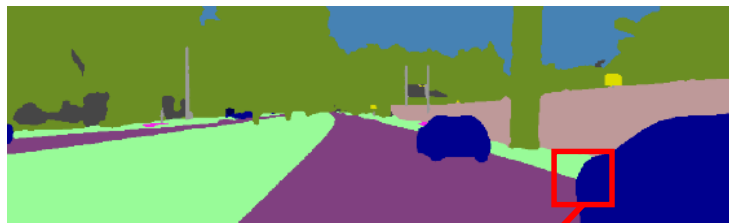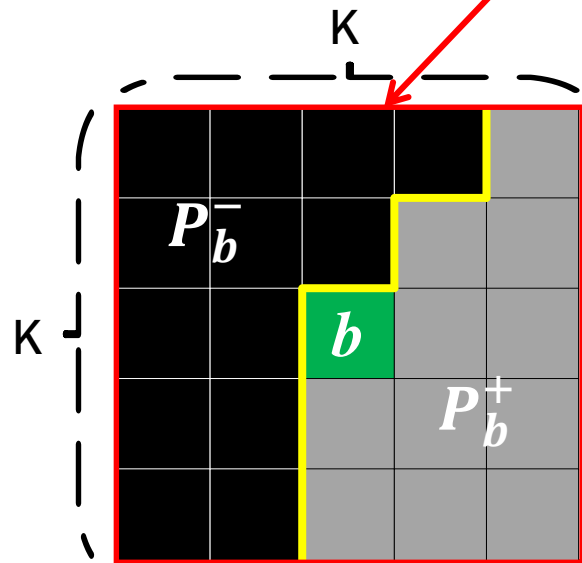

# Depth Feature

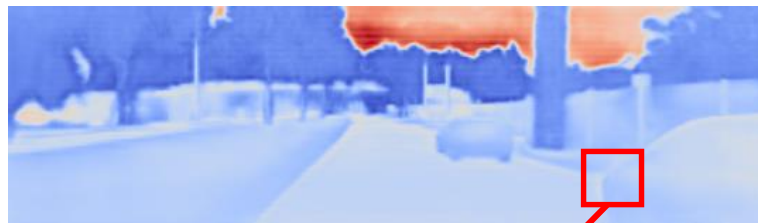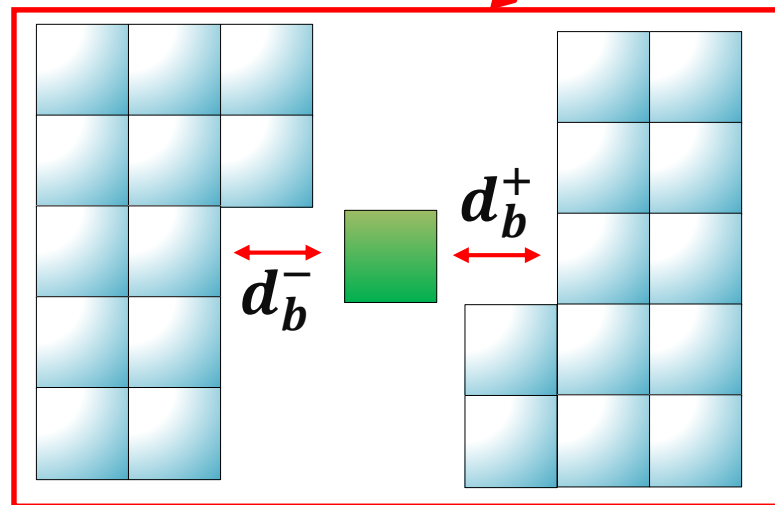

Supplement: Supplementary file 4 [file 136610299-supp.zip]

Depth Feature

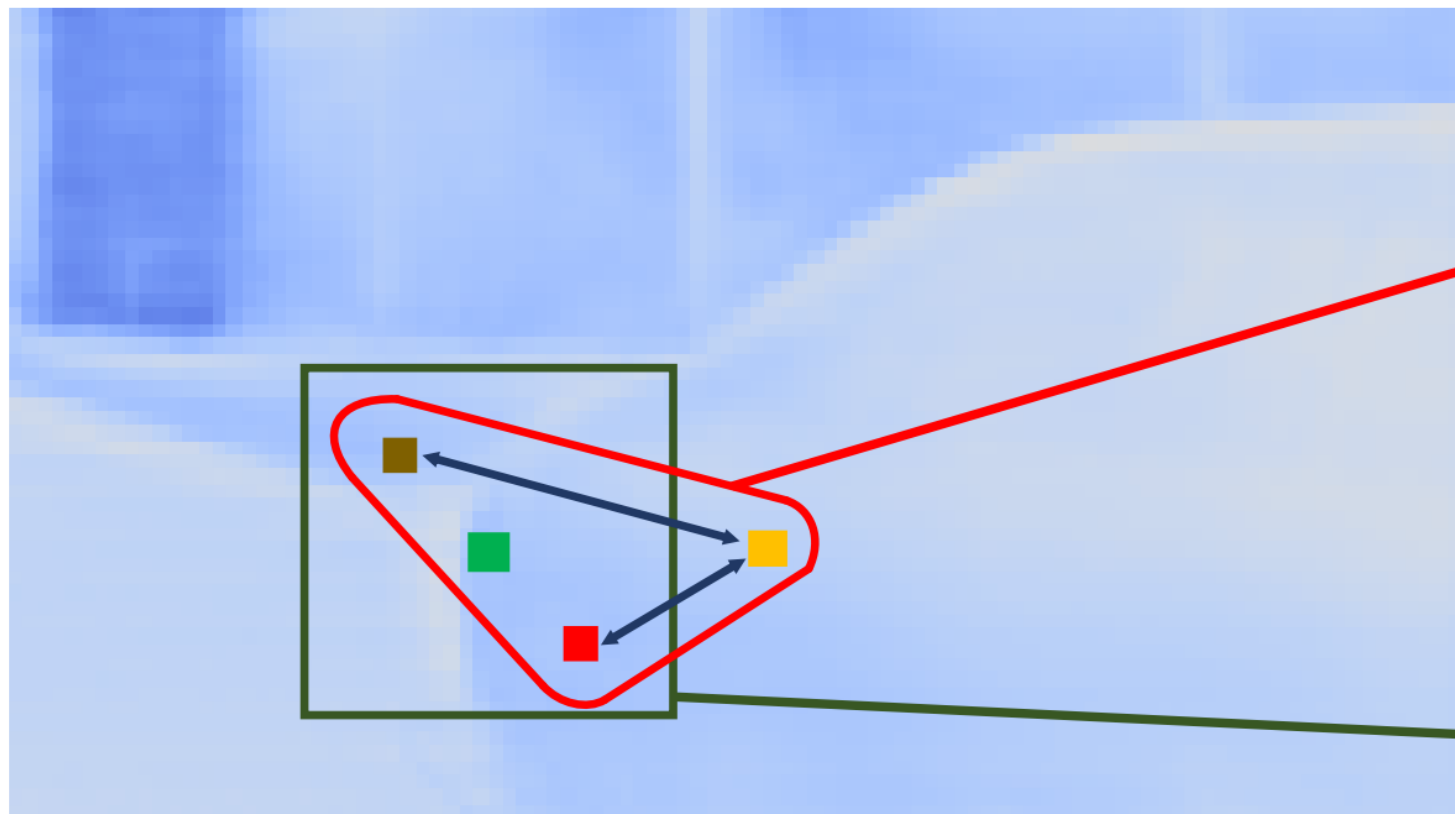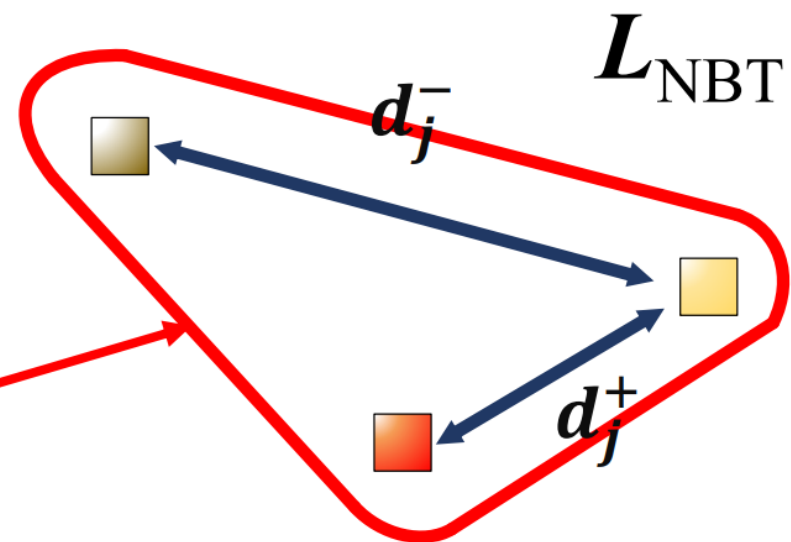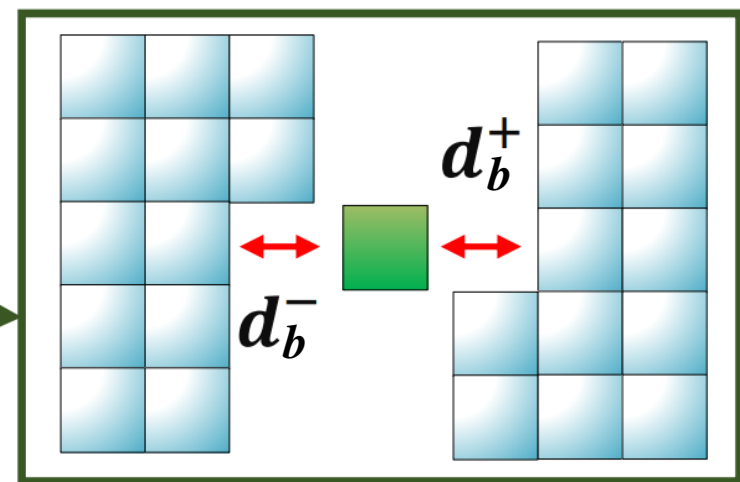

$L_{\text{BT}}$

Supplement: Supplementary file 5 [file 136610299-supp.zip]

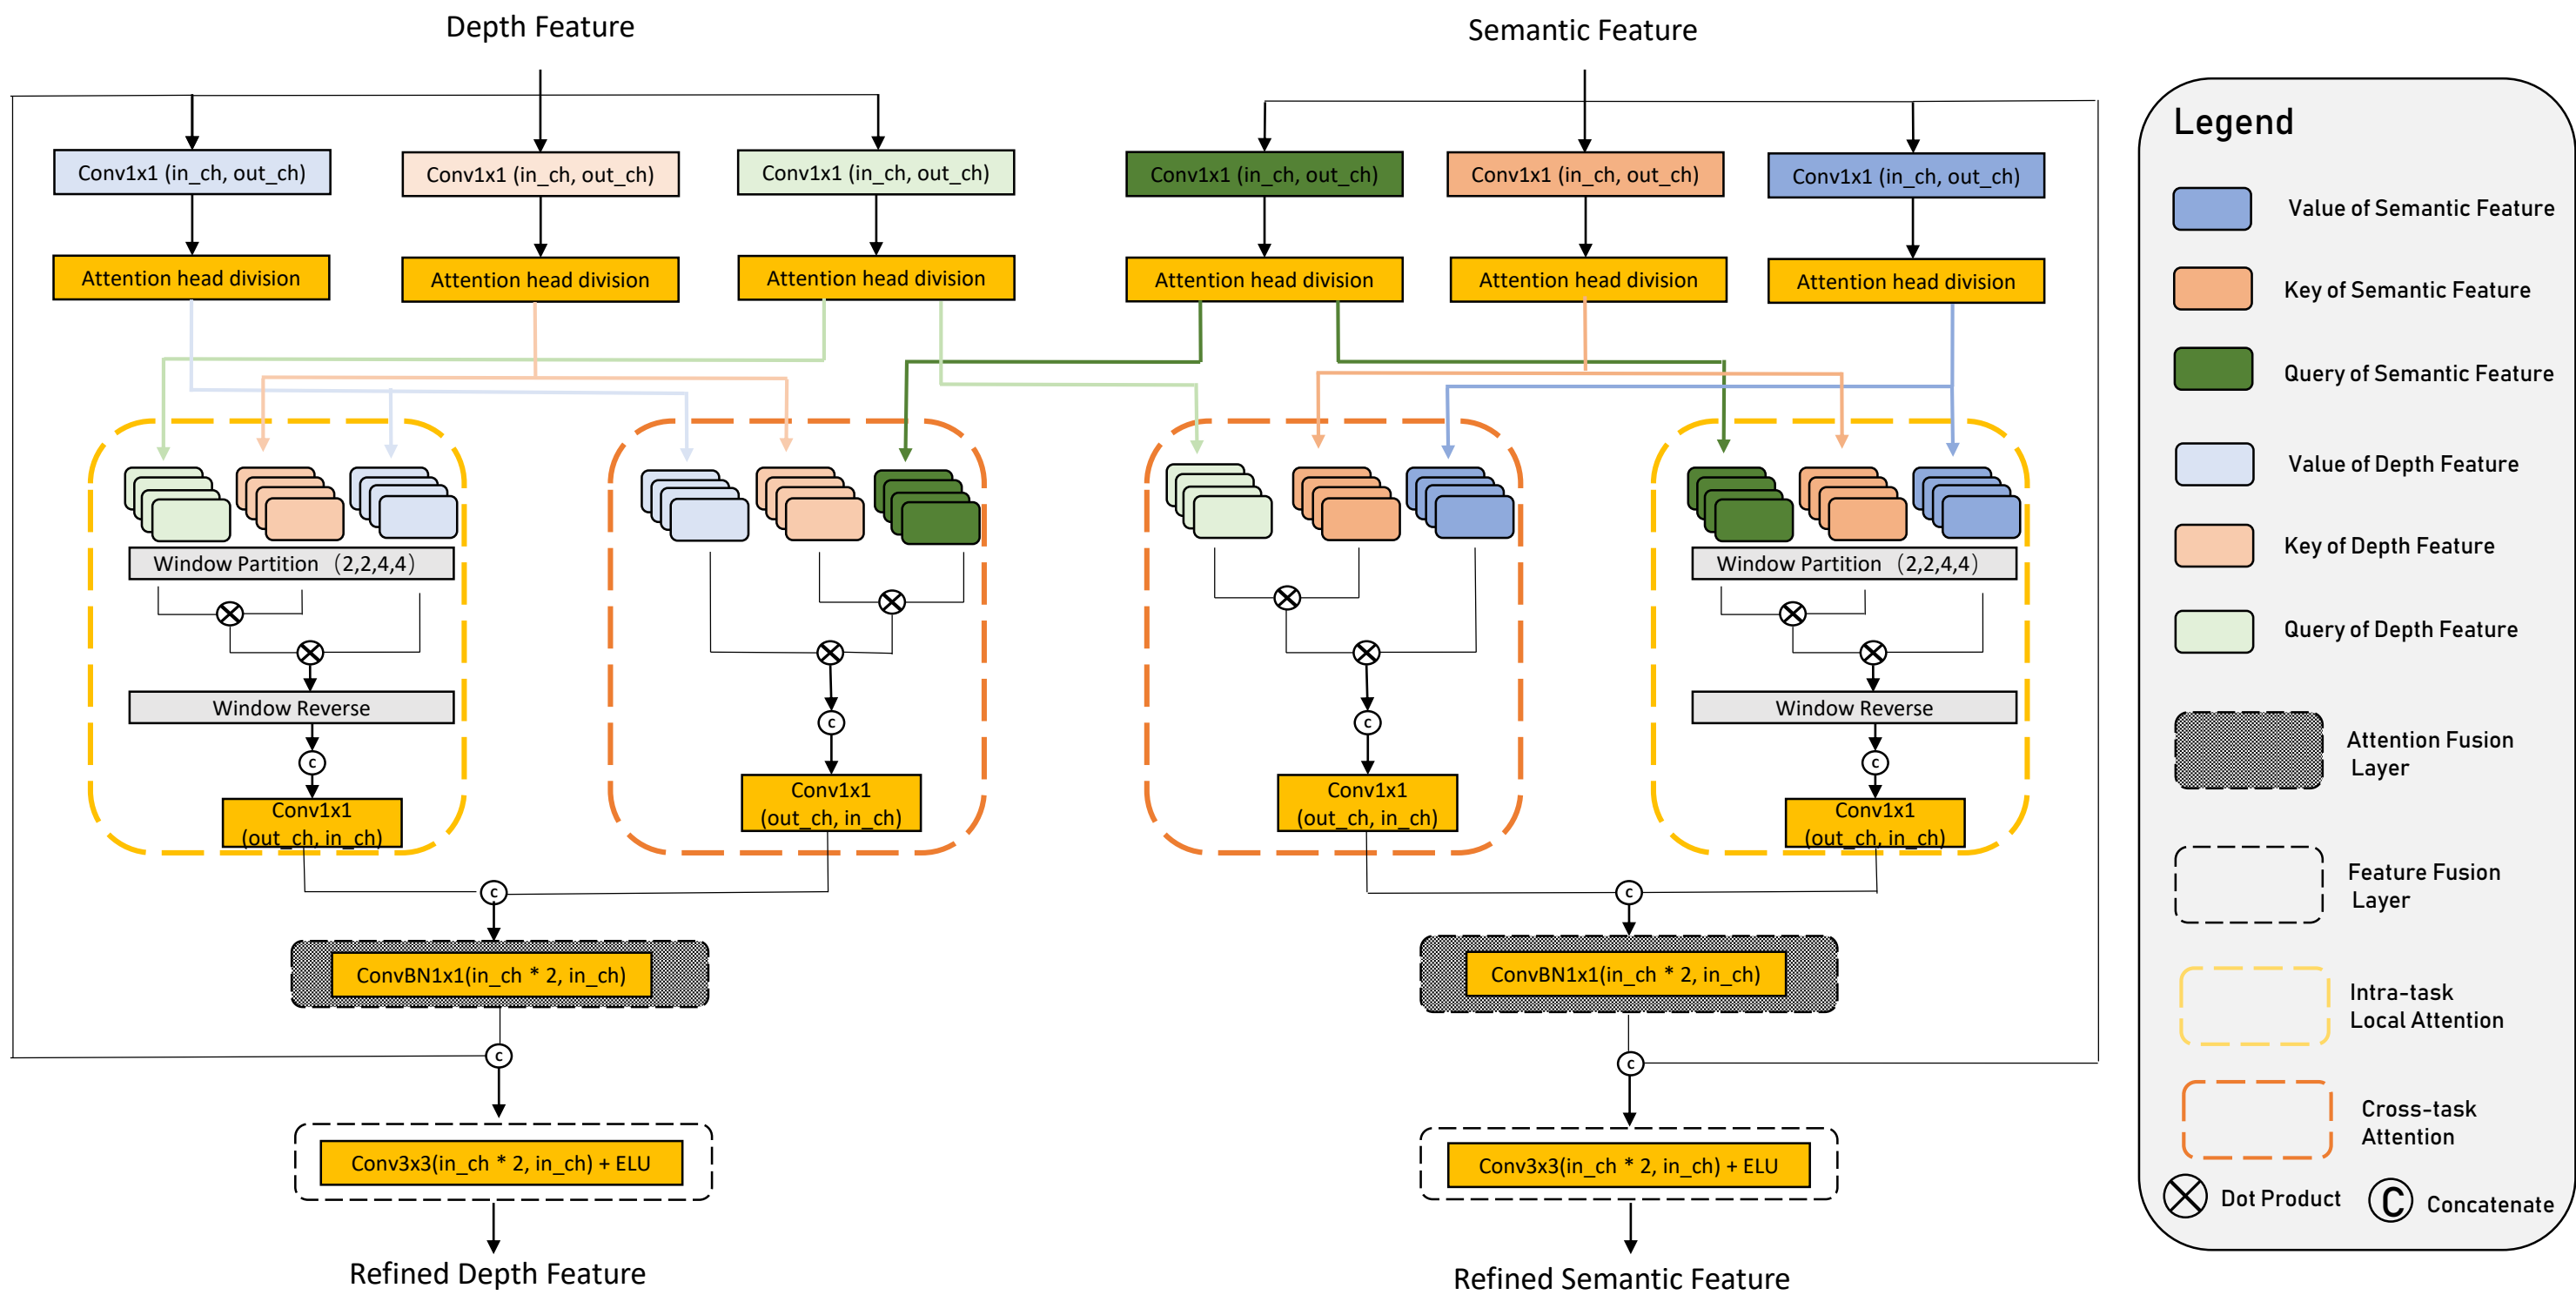

Supplement: Supplementary file 6 [file 136610299-supp.zip]

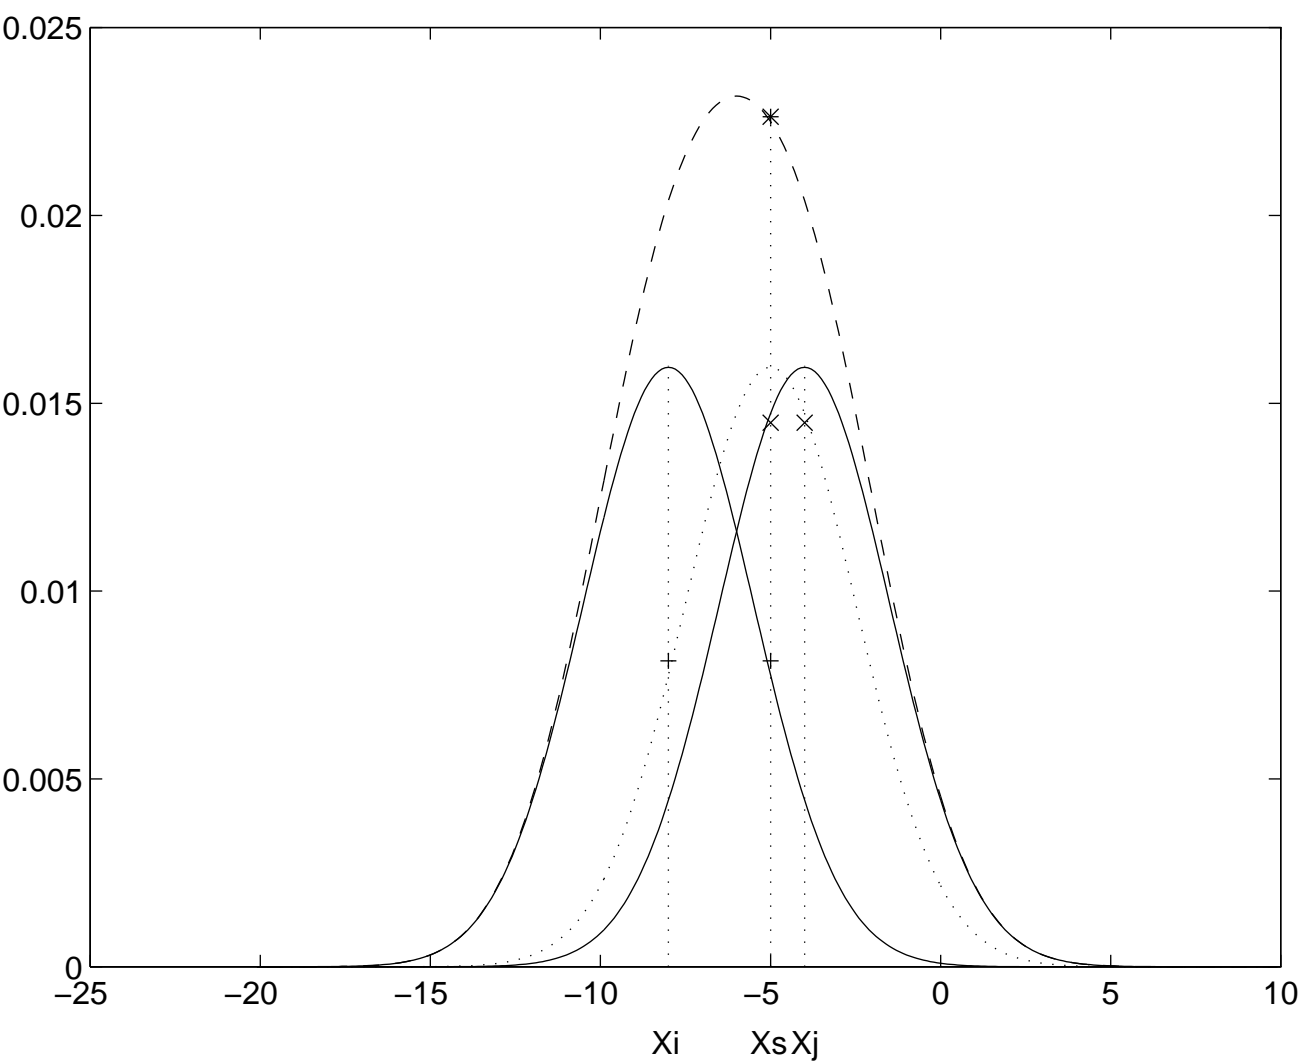

Supplement: Supplementary file 7 [file 136610299-supp.zip › 1925-supp/1925_Camera_Ready_Supp_latex/eijkel2.pdf]
